# Supplementary material for: BCG Vaccination in Early Childhood and Risk of Atopic Disease: A Systematic Review and Meta-Analysis
Source: Can Respir J. 2021 Nov 24;2021:5434315. doi: 10.1155/2021/5434315 (PMC8635936; doi:10.1155/2021/5434315)
Supplement: Supplementary Materials — The search strategy suitable for PubMed is provided in Appendix 1. The PRISMA checklist includes the Systematic Reviews and Meta-Analyses (PRISMA) guidelines. [file 5434315.f1.zip]

Archive with 2 entries (2 files):
- 5434315.f1/appendix1 (1).docx
- 5434315.f1/PRISMA_2020_checklist (2).docx
